# Supplementary material for: Temporal Coordination of Carbohydrate Metabolism during Mosquito Reproduction
Source: PLoS Genet. 2015 Jul 9;11(7):e1005309. doi: 10.1371/journal.pgen.1005309 (PMC4497655; doi:10.1371/journal.pgen.1005309)
Supplement: S4 Table — Differential gene expression in iLuc and iMet was calculated by comparison with 72h PE mosquito with a false discovery rate (P value) ≤0.01 (Zou et al., 2013). The control 72h PE was compared to 6h PE. (XLSX) [file pgen.1005309.s011.xlsx]

## Sheet: Sheet1
TargetID	Gene Name	Abbreviation	Pathway	PE 72h/PE 6h	iLuc/PE 72h	iMet/PE 72h
AAEL000703	Glycogen phosphorylase	GLY	Glycogen/sugar Metabolism	-4.55507	0.196924	4.40116
AAEL004221	Glycogen synthase	GYS	Glycogen/sugar Metabolism	-0.454686	0.071441	0.294221
AAEL005617	UTP--glucose-1-P uridylyltransferase	GALU	Glycogen/sugar Metabolism	-1.61797	0.132531	1.97395
AAEL006446	Trehalose-6-phosphate synthase	TPS	Glycogen/sugar Metabolism	-0.573119	-0.0855636	1.48492
AAEL009658	alpha,alpha-Trehalase	TREA	Glycogen/sugar Metabolism	-2.23752	-0.0412665	1.03793
AAEL009838	Glycogen debranching enzyme	GDE	Glycogen/sugar Metabolism	-0.594952	0.0390843	1.98338
AAEL010602	Glycogen branching enzyme	GBE	Glycogen/sugar Metabolism	-2.03958	0.182466	2.12276
AAEL010684	Trehalose-6-phosphate phosphatase	TPP	Glycogen/sugar Metabolism	-1.329	0.157038	1.1729
AAEL000080	Phosphoenolpyruvate carboxykinase	PEPCK	Glycolysis	-2.98418	-0.267352	2.13226
AAEL001158	Fructose-1,6-bisphosphatase	FBP	Glycolysis	0.254987	-0.0125013	0.342466
AAEL001668	Enolase	ENO	Glycolysis	0.992575	-0.0223371	0.231086
AAEL004295	Glucose-6-phosphatase	G6PC	Glycolysis	-0.498097	-0.112386	0.470318
AAEL004988	Phosphoglycerate kinase	PGK	Glycolysis	-0.994058	0.114388	1.15581
AAEL005766	Fructose-bisphosphate aldolase	ALDO	Glycolysis	1.77275	0.175294	-0.0656101
AAEL006070	Phosphoglycerate mutase	PGAM	Glycolysis	-0.948245	0.127528	1.12063
AAEL006895	Phosphofructokinase	PFK	Glycolysis	-0.337	-0.360438	0.388004
AAEL009387	Hexokinase	HEX	Glycolysis	0.0173865	-0.304681	1.56117
AAEL009691	Pyruvate carboxylase	PYC	Glycolysis	-0.619756	-0.0261106	0.398756
AAEL010037	Phosphoglucomutase	PGM	Glycolysis	-2.34201	0.317204	2.67983
AAEL012014	L-lactate dehydrogenase	LDH	Glycolysis	-1.70202	0.0663437	0.921199
AAEL012576	Pyruvate kinase	PYK	Glycolysis	-0.39838	0.136912	1.97288
AAEL012994	Glucose-6-phosphate isomerase	GPI	Glycolysis	-1.07784	0.0503134	1.96781
AAEL004434	Transketolase	TAL	Pentose Phosphate Pathway	0.276935	-0.197438	-0.506088
AAEL005931	6-phosphogluconate dehydrogenase	PGD	Pentose Phosphate Pathway	-0.386122	0.154624	0.393752
AAEL009507	Glucose-6-phosphate dehydrogenase	G6PD	Pentose Phosphate Pathway	0.702	0.184666	1.17142
AAEL010505	Ribulose-phosphate 3-epimerase	RPE	Pentose Phosphate Pathway	0.159282	-0.3345	0.515798
AAEL011627	Ribose 5-phosphate isomerase A	RPIA	Pentose Phosphate Pathway	1.10523	0.138709	-1.2821
AAEL014204	6-phosphogluconolactonase	PGLS	Pentose Phosphate Pathway	-0.655758	-0.0351003	0.379791
AAEL000746	NADP-Isocitrate dehydrogenase	NADP-IDH	Citrate Cycle	-0.766836	0.119693	0.285651
AAEL001091	Malic enzyme	ME	Citrate Cycle	-1.81256	-0.0502651	0.555691
AAEL002956	Citrate synthase	CS	Citrate Cycle	0.13358	-0.00155296	0.498498
AAEL005308	Pyruvate dehydrogenase	PDH	Citrate Cycle	0.22356	-0.482867	0.315463
AAEL007375	Pyruvate dehydrogenase kinase	PDK	Citrate Cycle	-0.359792	0.248013	1.36365
AAEL007707	Malate dehydrogenase	MDH	Citrate Cycle	0.717096	0.0755239	0.266263
AAEL010814	Isocitrate dehydrogenase	IDH	Citrate Cycle	-0.975235	0.0725636	0.267634
AAEL011746	Succinyl-coa synthetase	LSC	Citrate Cycle	-0.548745	-0.0974486	1.19858
